# Supplementary material for: Do Roads Alter the Trophic Behavior of the Mesocarnivore Community Living Close to Them?
Source: MDPI journal article supplement (doi:10.3390/d13040173), 2021-04-18
Supplement: s1 [file s1]

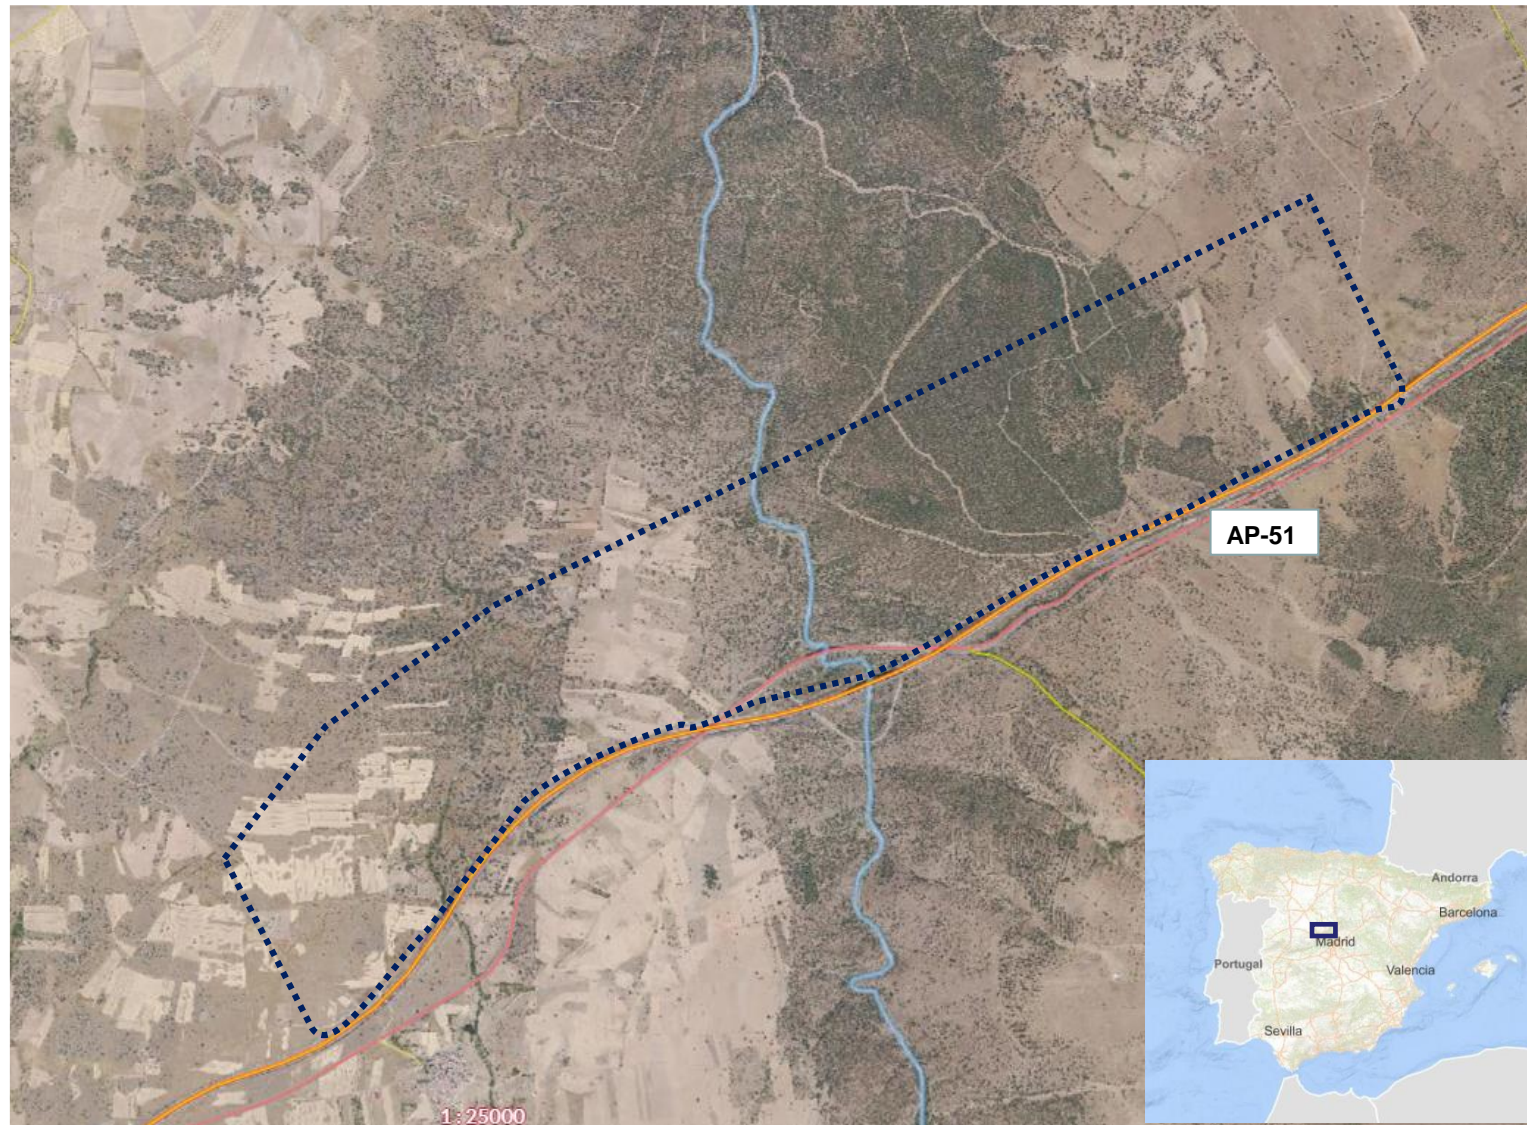

**Figure S1.** Study area location: A 5-km stretch of the AP-51 motorway. Transects were established parallel to the northbound carriageway, area is showed inside the dashed line. Source: IDECYL <https://idecyl.jcyl.es/vcig/>. Projection: UTM. Datum: ETRS 89. Units: meters. Scale:1 :25000.

**Table S1.** Morphological identification (Morphological Id.) of scats compared with identifications by genetic analysis (DNA Id.). % Matches = % of scats correctly identified by both methods, including number of samples in brackets.

|                          |                  | <b>Morphological Id.</b> |                 |         |        |     |       |                  |                     |
|--------------------------|------------------|--------------------------|-----------------|---------|--------|-----|-------|------------------|---------------------|
|                          |                  | weasel                   | stone<br>marten | red fox | badger | cat | genet | <i>Canis</i> sp. | european<br>polecat |
| <b>DNA Id.</b>           | weasel           | 0                        | 0               | 0       | 0      | 0   | 0     | 0                | 0                   |
|                          | stone marten     | 1                        | 8               | 0       | 0      | 0   | 0     | 0                | 0                   |
|                          | red fox          | 0                        | 20              | 27      | 1      | 2   | 0     | 0                | 0                   |
|                          | badger           | 0                        | 0               | 0       | 1      | 0   | 0     | 0                | 0                   |
|                          | <i>Felis</i> sp. | 0                        | 1               | 2       | 0      | 2   | 0     | 0                | 0                   |
|                          | genet            | 0                        | 1               | 0       | 0      | 0   | 1     | 0                | 0                   |
|                          | <i>Canis</i> sp. | 0                        | 0               | 0       | 0      | 0   | 0     | 1                | 0                   |
|                          | european polecat | 0                        | 0               | 1       | 1      | 0   | 0     | 0                | 0                   |
|                          | <b>% Matches</b> | 0                        | 26.67           | 90      | 33.33  | 50  | 100   | 100              |                     |
| <b>Total 57.14% (70)</b> |                  | (1)                      | (30)            | (30)    | (3)    | (4) | (1)   | (1)              | 0                   |

**Table S2.** Correction factors (CF) used per species to convert weight of each food category found in scats into fresh biomass ingested.

| <b>Species</b>        | <b>stone marten</b>          | <b>red fox</b>                     | <b>badger</b>                                    | <b>cat</b>    |
|-----------------------|------------------------------|------------------------------------|--------------------------------------------------|---------------|
| small mammals         | 23.00                        | 23.00                              | 21.72                                            | 23.60         |
| lagomorphs            | 50.00                        | 50.00                              | 25.74                                            | 37.70         |
| fruits and seeds      | 14.00                        | 14.00                              | 20.40                                            | 14.00         |
| arthropods            | 5.00                         | 5.00                               | 5.00                                             | 5.00          |
| reptiles              | 45.00                        | 18.00                              | 19.40                                            | 40.70         |
| birds                 | 35.00                        | 35.00                              | 19.81                                            | 42.20         |
| <b>Source of data</b> | Romanowski and Lesinski 1991 | Jedrzejewska and Jedrzejewski 1998 | Rosalino et al. 2003; Revilla and Palomares 2002 | Sarmento 1996 |

**Table S3.** Descriptive diet indices obtained per species. FO: frequency of occurrence of prey items, expressed as the percentage of scats containing a certain food item; RF: relative frequency of occurrence, expressed as the percentage of occasions one food item occurs in relation to total occurrences of all food items. PB: percentage of fresh biomass ingested.

| Food Ítem        | stone marten (N=120) |      |      | red fox (N=195) |      |      | badger (N=61) |      |      | cat (N=122) |      |      |
|------------------|----------------------|------|------|-----------------|------|------|---------------|------|------|-------------|------|------|
|                  | FO                   | RF   | PB   | FO              | RF   | PB   | FO            | RF   | PB   | FO          | RF   | PB   |
| small mammals    | 55.0                 | 31.4 | 24.8 | 76.4            | 37.3 | 38.3 | 67.2          | 31.5 | 37.1 | 85.2        | 44.8 | 63.7 |
| lagomorphs       | 13.3                 | 7.62 | 22.0 | 15.9            | 7.8  | 44.1 | 14.7          | 6.9  | 20.9 | 20.5        | 10.8 | 23.0 |
| fruits and seeds | 27.5                 | 15.7 | 44.3 | 12.3            | 6.0  | 10.6 | 19.7          | 9.2  | 24.1 | 8.2         | 4.3  | 1.0  |
| arthropods       | 60.8                 | 34.8 | 2.9  | 74.3            | 36.3 | 2.6  | 91.8          | 43.0 | 15.5 | 49.2        | 25.9 | 0.7  |
| reptiles         | 10.8                 | 6.19 | 3.9  | 11.2            | 5.5  | 1.6  | 11.5          | 5.4  | 1.9  | 13.1        | 6.9  | 8.2  |
| birds            | 7.5                  | 4.29 | 2.0  | 14.3            | 7.0  | 2.7  | 8.2           | 3.8  | 0.4  | 13.9        | 7.3  | 3.3  |

**Table S4.** Spearman correlation coefficients ( $r_s$ ) between percentage biomass (PBs) of food categories present in scats and values of coordinates obtained in the three MDS axes (MDS1, MDS2, MDS3).

| Food categories (PB) | MDS1   |         | MDS2   |         | MDS3   |         |
|----------------------|--------|---------|--------|---------|--------|---------|
|                      | $r_s$  | P       | $r_s$  | P       | $r_s$  | P       |
| lagomorphs           | -0.365 | < 0.001 | 0.601  | < 0.001 | 0.562  | < 0.001 |
| small mammals        | 0.981  | < 0.001 | -0.067 | 0.133   | -0.236 | < 0.001 |
| fruit and seeds      | -0.356 | < 0.001 | 0.359  | < 0.001 | -0.560 | < 0.001 |
| arthropods           | -0.457 | < 0.001 | -0.717 | < 0.001 | 0.358  | < 0.001 |
| reptiles             | -0.141 | 0.002   | 0.252  | < 0.001 | -0.234 | < 0.001 |
| birds                | -0.063 | 0.159   | -0.314 | < 0.001 | -0.159 | < 0.001 |

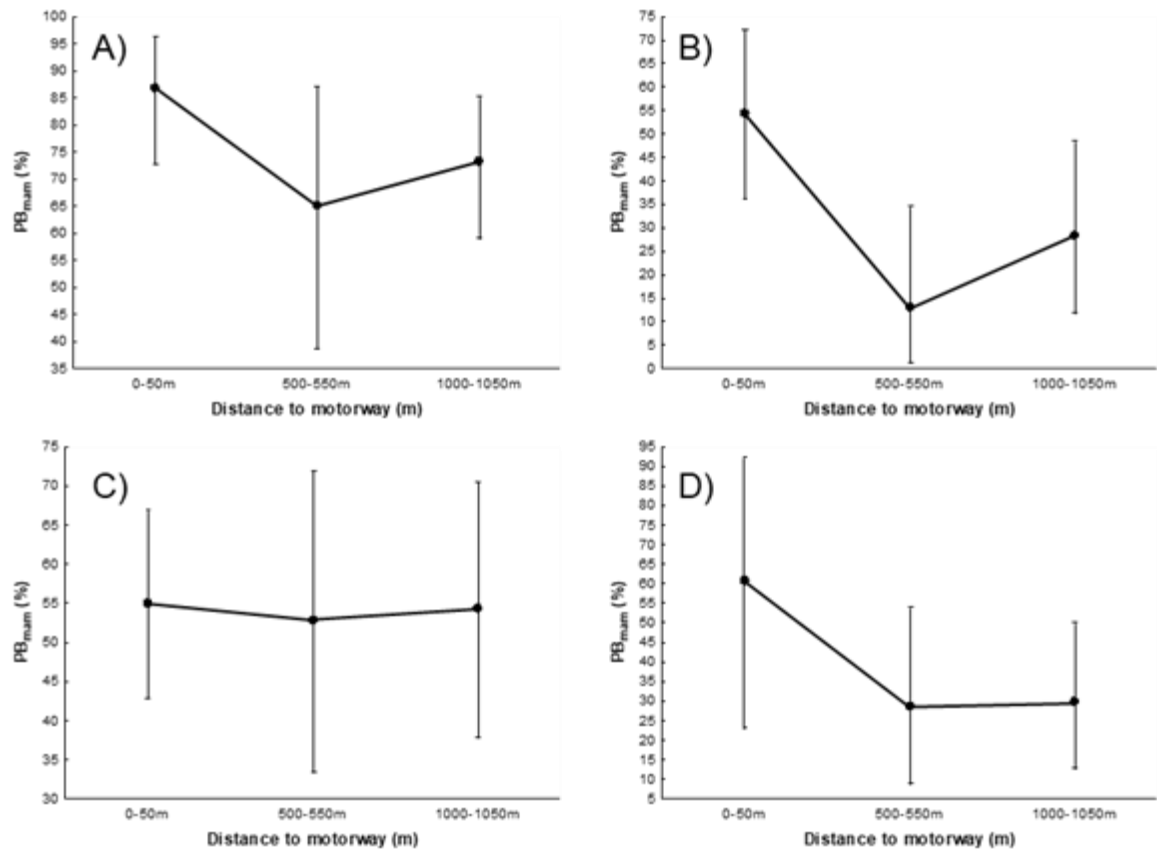

**Figure S2.** Weighted Marginal Means and confidence intervals (CI-95%) of percentages of fresh small mammal biomass (PB<sub>mam</sub>) in scats from the four carnivore species collected at the three bands considered. Pannels correspond to A) cat, B) stone marten, C) red fox, D) badger. The variable was arcsine-square root for analysis but its graphical representation has been back-transformed to facilitate its interpretation. Note that Y axis scales differ among carnivores.
