# Supplementary material for: Do Roads Alter the Trophic Behavior of the Mesocarnivore Community Living Close to Them?
Source: MDPI journal article supplement (doi:10.3390/d13040173), 2021-04-18
Supplement: s1 [file s1]

Archive with 1 entries (1 files):
- diversity-1138240-supplementary.pdf
